# Supplementary material for: A novel cuprotosis-related lncRNA signature effectively predicts prognosis in glioma patients
Source: Research Square preprint supplement (doi:10.21203/rs.3.rs-1549548/v2), 2022-05-19
Supplement: Supplementary file 1 [file 00faac898a874f129cac4687.xlsx]

## Sheet: Sheet1
gene	lncRNA	cor	pvalue
GLS	AC015468.3	0.778937	3.43453e-143
GLS	AL021395.1	0.857921	1.7739e-203
GLS	AL031710.1	0.406569	3.64033e-29
GLS	DLGAP1-AS4	0.853303	5.11796e-199
FDX1	AC087481.3	-0.409228	1.46246e-29
PDHA1	AC093297.2	0.433968	2.01753e-33
LIAS	AC139768.1	0.439145	2.85532e-34
GLS	AL513477.2	0.405181	5.84101e-29
LIAS	AC027130.1	0.401245	2.20523e-28
FDX1	AC122129.1	-0.512624	4.92111e-48
FDX1	AC124312.2	-0.492366	6.70595e-44
LIPT1	AC124312.2	-0.426516	3.17308e-32
GLS	AC124312.2	0.564931	4.26297e-60
FDX1	FAM181A-AS1	0.480268	1.4676e-41
PDHA1	FAM181A-AS1	-0.437494	5.34683e-34
LIAS	AC019080.5	0.464026	1.46104e-38
FDX1	ERICH6-AS1	0.462291	2.98886e-38
LIPT1	MINCR	0.433783	2.16212e-33
MTF1	LINC01135	0.559693	8.62401e-59
LIAS	AC007114.1	0.412164	5.29186e-30
LIPT1	TAF1A-AS1	0.507788	5.06412e-47
GLS	ATP2B1-AS1	0.776894	5.6754e-142
FDX1	AL049749.1	-0.409463	1.34856e-29
FDX1	AL136964.1	-0.444996	3.00821e-35
GLS	AL136964.1	0.410555	9.24897e-30
FDX1	AL355974.2	0.457474	2.13399e-37
FDX1	AL121908.1	-0.424123	7.5759e-32
FDX1	LINC02381	0.44895	6.41123e-36
LIAS	AC073389.3	0.402551	1.42204e-28
LIAS	AC069224.1	0.429941	9.01939e-33
GLS	AC015967.1	0.671266	1.36384e-92
GLS	DPP10-AS1	0.575407	8.8393e-63
FDX1	AL049597.2	0.425659	4.33686e-32
FDX1	AL022313.4	-0.494489	2.54786e-44
MTF1	AC009102.2	0.431778	4.56596e-33
GLS	AC008780.2	0.838774	6.31073e-186
FDX1	AL445524.1	0.47846	3.22355e-41
LIPT1	AL445524.1	0.414628	2.23684e-30
FDX1	LINC00665	0.407506	2.64259e-29
DLAT	AC084824.5	-0.402169	1.61727e-28
FDX1	LINC00294	-0.470444	9.98411e-40
GLS	LINC00294	0.543412	7.07984e-55
DLAT	AP001505.1	-0.401666	1.9148e-28
FDX1	ZSCAN16-AS1	0.456827	2.77222e-37
LIPT1	ZSCAN16-AS1	0.54269	1.04422e-54
GLS	AC008966.2	0.420907	2.41384e-31
GLS	CFAP58-DT	0.58246	1.21578e-64
FDX1	AL031587.1	-0.500414	1.64853e-45
FDX1	DGCR9	-0.440302	1.83601e-34
DLAT	AC009088.1	-0.402963	1.23771e-28
FDX1	GDNF-AS1	-0.455773	4.2412e-37
FDX1	AL031651.2	-0.415462	1.66908e-30
DLAT	AC245884.8	-0.417595	7.8567e-31
MTF1	AC107959.1	0.489473	2.48166e-43
LIAS	OXCT1-AS1	0.412812	4.22277e-30
FDX1	AC138207.5	0.42238	1.42206e-31
LIAS	LINC00847	0.45434	7.54128e-37
GLS	LINC00847	-0.415491	1.65194e-30
FDX1	AL157392.3	-0.514589	1.88814e-48
FDX1	AL355338.1	0.45767	1.97136e-37
LIPT1	AL355338.1	0.43418	1.86328e-33
GLS	AC010624.2	0.456861	2.73473e-37
LIAS	AC022306.2	0.432421	3.59459e-33
FDX1	DLGAP1-AS1	0.559233	1.12042e-58
LIPT1	DLGAP1-AS1	0.505426	1.55979e-46
FDX1	AL441992.1	0.447026	1.36351e-35
FDX1	AP000802.1	0.426227	3.52556e-32
DLAT	AC108673.3	-0.409565	1.30185e-29
FDX1	LINC00339	0.565019	4.05139e-60
LIPT1	LINC00339	0.494588	2.43523e-44
FDX1	LINC00641	-0.426719	2.94612e-32
GLS	LINC00641	0.486914	7.81178e-43
LIPT1	GAS5	0.427902	1.91059e-32
DLAT	AC078909.2	-0.43587	9.8749e-34
FDX1	LINC01150	0.417535	8.02638e-31
PDHA1	LINC01150	-0.445219	2.75822e-35
LIAS	DICER1-AS1	0.463687	1.68117e-38
DLAT	DICER1-AS1	-0.400487	2.84232e-28
FDX1	MIR4435-2HG	0.472226	4.68978e-40
FDX1	AC024075.3	-0.43983	2.19933e-34
GLS	AC092376.2	0.548874	3.63733e-56
MTF1	AC098484.1	0.478223	3.57253e-41
GLS	RNF144A-AS1	0.865242	6.97692e-211
FDX1	LINC00623	0.407483	2.66287e-29
GLS	AC148477.1	0.594053	8.39003e-68
LIAS	SNHG8	0.467594	3.31031e-39
FDX1	AC020558.2	-0.401122	2.29816e-28
FDX1	AP001107.4	-0.422636	1.29656e-31
GLS	ASB16-AS1	-0.40864	1.79028e-29
LIAS	AC074032.1	0.432552	3.42359e-33
FDX1	AC053513.1	-0.439113	2.89014e-34
LIAS	AC008966.1	0.483112	4.21642e-42
FDX1	AL117332.1	0.459076	1.11362e-37
FDX1	PCED1B-AS1	0.540493	3.3847e-54
PDHA1	PCED1B-AS1	-0.479433	2.11203e-41
FDX1	AC093726.1	0.412513	4.68699e-30
FDX1	AC120036.4	-0.442074	9.30658e-35
LIAS	AL513217.1	0.420133	3.18429e-31
GLS	AC104072.1	0.825754	2.94882e-175
LIAS	EIF3J-DT	0.451674	2.18392e-36
FDX1	MIR600HG	-0.471829	5.55147e-40
LIPT1	MIR600HG	-0.444306	3.93176e-35
GLS	MIR600HG	0.709357	8.01688e-108
DLAT	AC069281.2	-0.425557	4.50153e-32
FDX1	LINC01023	0.46037	6.57199e-38
GLS	AC018358.1	0.865876	1.52012e-211
FDX1	AC108449.2	-0.436909	6.67269e-34
FDX1	AC093673.1	0.435188	1.27622e-33
DLAT	AL136295.7	-0.426478	3.21731e-32
LIAS	AC084824.4	0.400935	2.44677e-28
FDX1	NORAD	-0.496993	8.06217e-45
LIPT1	NORAD	-0.411224	7.33413e-30
GLS	NORAD	0.437548	5.23747e-34
FDX1	AC073896.2	0.53173	3.3843e-52
LIPT1	AC073896.2	0.497288	7.03609e-45
FDX1	AL133415.1	0.427187	2.48272e-32
LIPT1	AC245297.3	0.444708	3.36343e-35
FDX1	SLC6A1-AS1	-0.538696	8.7988e-54
MTF1	NUP50-DT	-0.523053	2.83625e-50
FDX1	AL139246.1	-0.415813	1.47486e-30
FDX1	AC024075.1	-0.485109	1.74361e-42
LIAS	EPB41L4A-AS1	0.445952	2.07381e-35
GLS	LY86-AS1	0.894069	5.89728e-245
FDX1	AL604028.1	0.613086	2.79591e-73
LIPT1	AL604028.1	0.442949	6.64365e-35
FDX1	AL133367.1	-0.403392	1.07093e-28
FDX1	CRNDE	0.417497	8.13628e-31
FDX1	FAM201A	-0.415682	1.54467e-30
MTF1	AL355001.2	-0.436428	8.00197e-34
LIAS	AC019131.2	0.417366	8.52082e-31
LIAS	AP002360.1	0.428315	1.64196e-32
FDX1	LINC01503	0.425102	5.31156e-32
DLAT	AC007292.1	-0.444615	3.48707e-35
GLS	AL365205.3	0.580497	4.051e-64
FDX1	ZNF236-DT	0.504437	2.49142e-46
GLS	AC012603.1	0.490689	1.43416e-43
FDX1	AC020915.3	0.411983	5.63468e-30
LIAS	AC099522.2	0.421338	2.06826e-31
MTF1	AC008537.2	0.438667	3.42586e-34
FDX1	AC103974.1	-0.441019	1.39556e-34
LIPT1	SNHG25	0.42809	1.78337e-32
FDX1	TMEM220-AS1	0.4171	9.36314e-31
FDX1	AC097534.2	0.435466	1.14957e-33
LIPT1	AC097534.2	0.526124	6.00348e-51
FDX1	AC012213.4	-0.400649	2.69316e-28
FDX1	AC104985.1	-0.497197	7.33909e-45
LIAS	LINC00882	0.493921	3.30321e-44
MTF1	AC022509.3	0.495269	1.78244e-44
FDX1	AL139260.1	0.489008	3.05791e-43
FDX1	LINC01778	0.432011	4.18743e-33
LIAS	AC007541.1	0.443093	6.28562e-35
LIAS	AP004609.3	0.420762	2.54215e-31
FDX1	B3GALT5-AS1	0.446936	1.41252e-35
DLAT	AC103691.1	-0.413949	2.8383e-30
DLAT	AC005785.1	-0.424518	6.56675e-32
MTF1	ID2-AS1	0.401855	1.79718e-28
FDX1	AC005476.2	0.418288	6.1462e-31
FDX1	AC245060.5	-0.431744	4.62502e-33
GLS	AL121929.2	0.585079	2.40892e-65
FDX1	ZNF529-AS1	0.548557	4.32747e-56
LIPT1	ZNF529-AS1	0.43368	2.24696e-33
GLS	AC026790.1	0.609927	2.40731e-72
FDX1	AL035530.2	-0.418273	6.17857e-31
FDX1	AC018755.4	0.416629	1.10588e-30
FDX1	ZNF32-AS2	-0.444207	4.08451e-35
FDX1	LINC00599	-0.453533	1.04147e-36
FDX1	AL512625.2	-0.450397	3.6227e-36
LIAS	AC008443.4	0.4321	4.05086e-33
MTF1	AC008443.4	-0.402002	1.71039e-28
LIPT1	AC116407.2	0.505146	1.78093e-46
FDX1	AC015917.2	0.41067	8.88686e-30
MTF1	SNHG11	-0.409759	1.21759e-29
DLAT	AC027601.3	-0.418702	5.30512e-31
LIAS	DNAJC9-AS1	0.509253	2.50866e-47
LIPT1	AP003352.1	0.469837	1.2897e-39
MTF1	AP003352.1	-0.469059	1.79011e-39
GLS	LINC01785	0.707873	3.49389e-107
FDX1	PAXBP1-AS1	-0.474731	1.61035e-40
LIAS	LINC-PINT	0.40403	8.62916e-29
FDX1	AC002398.1	0.440985	1.41359e-34
LIPT1	AC020765.2	0.425712	4.25362e-32
GLS	AC004816.1	0.730851	1.47256e-117
GLS	AC110491.1	0.797337	8.85195e-155
FDX1	AC105206.2	-0.490692	1.4321e-43
FDX1	AC010226.1	0.492258	7.04501e-44
DLAT	AC095057.3	-0.403893	9.04022e-29
FDX1	AL451165.2	0.5079	4.79804e-47
LIPT1	AL451165.2	0.472537	4.10861e-40
FDX1	AC010834.3	-0.479542	2.01418e-41
FDX1	AC104117.3	-0.419579	3.88077e-31
FDX1	AC018797.2	0.555069	1.17354e-57
LIPT1	AC018797.2	0.624616	8.76673e-77
GLS	AC107952.2	0.450876	2.99696e-36
GLS	AC138649.1	0.769829	7.3654e-138
MTF1	RNF219-AS1	0.408592	1.82053e-29
FDX1	ZNF561-AS1	0.433445	2.45365e-33
LIPT1	ZNF561-AS1	0.548176	5.33309e-56
LIAS	MAPKAPK5-AS1	0.555112	1.1458e-57
LIPT1	MAPKAPK5-AS1	0.540466	3.43292e-54
MTF1	MAPKAPK5-AS1	-0.581783	1.84288e-64
GLS	AC002351.1	0.503755	3.439e-46
FDX1	Z97653.1	-0.411611	6.41313e-30
LIAS	TRAM2-AS1	0.4681	2.67817e-39
FDX1	AL132989.1	-0.406546	3.66894e-29
LIAS	CNNM3-DT	0.405959	4.48224e-29
GLS	SLC26A4-AS1	0.873265	1.62857e-219
FDX1	NRAV	0.502402	6.50052e-46
FDX1	AC008915.2	0.607036	1.68952e-71
LIPT1	AC008915.2	0.451435	2.40074e-36
GLS	LINC00957	0.58568	1.65739e-65
GLS	OIP5-AS1	0.724882	9.21785e-115
PDHA1	AL592424.1	0.407033	3.10701e-29
LIAS	AC026471.2	0.473275	3.00092e-40
DLAT	AC135050.3	-0.467688	3.18259e-39
LIAS	BDNF-AS	0.460085	7.38066e-38
LIAS	AC004130.1	0.413365	3.48145e-30
LIPT1	AC004130.1	0.423499	9.49631e-32
MTF1	CHL1-AS2	-0.416788	1.04568e-30
FDX1	BX284668.5	0.453061	1.25755e-36
FDX1	AL139161.1	0.404266	7.96603e-29
FDX1	AC254562.3	-0.4436	5.16736e-35
GLS	LINC00507	0.819182	3.33918e-170
GLS	MIR7-3HG	0.63126	7.18136e-79
LIAS	AC034228.1	0.434091	1.92679e-33
FDX1	AC008946.1	0.409636	1.2705e-29
LIPT1	AC008946.1	0.486333	1.01213e-42
FDX1	AL353751.1	-0.405783	4.75975e-29
DLAT	AC127024.6	-0.411659	6.30674e-30
GLS	AC010857.1	0.803582	5.46759e-159
DLAT	LINC00685	-0.448783	6.84706e-36
LIAS	AC073508.3	0.408921	1.62527e-29
GLS	AC121493.1	0.400306	3.01963e-28
GLS	LINC01018	0.765894	1.24523e-135
FDX1	AC147651.3	0.510337	1.48887e-47
FDX1	DGCR10	-0.400536	2.79635e-28
FDX1	AC112491.1	0.439568	2.4305e-34
LIPT1	AC112491.1	0.492649	5.89747e-44
LIAS	ENTPD3-AS1	0.450079	4.10689e-36
LIPT1	ENTPD3-AS1	0.454031	8.53391e-37
FDX1	AC083799.1	0.51759	4.31864e-49
GLS	AC104024.2	0.895339	1.1178e-246
MTF1	LINC01551	-0.43108	5.91777e-33
DLAT	LINC00342	-0.420926	2.39716e-31
FDX1	AC015922.3	0.407539	2.61232e-29
GLS	AC125616.1	0.737381	1.05006e-120
FDX1	TP53TG1	0.589796	1.25692e-66
LIPT1	TP53TG1	0.479462	2.08597e-41
DLAT	AL022328.2	-0.478136	3.71064e-41
FDX1	AL683813.1	-0.40573	4.84596e-29
GLS	AC092720.2	0.624891	7.20059e-77
FDX1	SNHG9	0.41938	4.16697e-31
LIPT1	SNHG9	0.413183	3.71038e-30
FDX1	MED14OS	0.497932	5.22378e-45
LIPT1	MED14OS	0.44174	1.05812e-34
LIPT1	DNAH10OS	-0.440502	1.70114e-34
LIAS	AC107032.2	0.421439	1.99428e-31
GLS	AL139352.1	0.504645	2.25754e-46
PDHA1	AC009878.1	0.406115	4.24988e-29
GLS	PART1	0.883785	9.04471e-232
GLS	AC139100.2	0.482809	4.81775e-42
FDX1	AC105277.1	0.512379	5.54245e-48
GLS	AC122707.1	0.468148	2.62469e-39
GLS	LINC01007	0.778687	4.84767e-143
FDX1	AC012213.1	-0.503524	3.8348e-46
FDX1	AP001453.2	0.518785	2.39079e-49
DLAT	AL359091.1	-0.461242	4.59801e-38
LIAS	AC016876.1	0.43867	3.422e-34
LIPT1	RAB30-AS1	0.4468	1.48973e-35
DLAT	AC010883.1	-0.427573	2.15571e-32
FDX1	AC073611.1	0.416489	1.16214e-30
FDX1	AC004771.3	-0.445401	2.56985e-35
LIAS	AC121761.2	0.406538	3.67891e-29
LIAS	NIFK-AS1	0.411894	5.81241e-30
FDX1	AL022328.1	-0.439979	2.07754e-34
FDX1	NFIA-AS2	0.422538	1.34328e-31
MTF1	AL390728.6	-0.401276	2.18292e-28
FDX1	FOXN3-AS1	0.474772	1.58184e-40
FDX1	TRAPPC12-AS1	-0.483891	2.98974e-42
LIAS	ZFAS1	0.413221	3.66128e-30
LIPT1	ZFAS1	0.468244	2.52119e-39
LIAS	AL354920.1	0.405045	6.11772e-29
FDX1	PSMB8-AS1	0.461659	3.87486e-38
FDX1	AC004158.1	-0.43234	3.70486e-33
FDX1	LINC02328	0.443226	5.96994e-35
FDX1	AP000721.2	-0.515338	1.30868e-48
LIPT1	AL121944.1	0.411014	7.88883e-30
GLS	HTR5A-AS1	0.919244	5.52425e-284
FDX1	AL031600.1	-0.418746	5.22128e-31
FDX1	SBF2-AS1	0.428557	1.502e-32
FDX1	LINC02449	-0.483824	3.07965e-42
GLS	AC092171.2	0.545149	2.77125e-55
GLS	HCG11	0.527653	2.754e-51
FDX1	AC005696.4	-0.492439	6.48746e-44
FDX1	LINC02482	0.478055	3.84366e-41
LIPT1	LINC02482	0.433867	2.09483e-33
MTF1	AL359513.1	-0.414798	2.10735e-30
FDX1	AL590666.2	-0.437154	6.08153e-34
LIAS	AL121655.1	0.409447	1.3563e-29
FDX1	ADGRA1-AS1	-0.435809	1.01031e-33
LIAS	PXN-AS1	0.484303	2.49176e-42
MTF1	PXN-AS1	-0.437754	4.84473e-34
FDX1	APTR	0.472037	5.0824e-40
LIPT1	APTR	0.443759	4.85854e-35
FDX1	AC026801.2	0.470524	9.65045e-40
LIAS	RPARP-AS1	0.515987	9.5142e-49
FDX1	NCAM1-AS1	-0.417019	9.63503e-31
DLAT	AL513320.1	-0.402815	1.30103e-28
FDX1	AC093157.1	0.502617	5.87596e-46
LIPT1	AC093157.1	0.449335	5.50893e-36
FDX1	AP000924.1	0.53543	4.92058e-53
MTF1	AC103923.1	0.425266	5.00336e-32
GLS	RFPL1S	0.803217	9.71644e-159
GLS	SNAI3-AS1	0.541094	2.45582e-54
DLAT	AC009283.1	-0.408818	1.68422e-29
FDX1	AL133342.1	0.447821	9.98742e-36
GLS	EMX2OS	0.553858	2.30913e-57
LIPT1	LINC00467	0.412839	4.18301e-30
GLS	AC106881.1	0.595296	3.77823e-68
FDX1	AC067852.3	-0.532185	2.67276e-52
LIPT1	TMEM44-AS1	0.439504	2.49001e-34
FDX1	AC108010.1	-0.408361	1.97099e-29
GLS	AC023301.1	0.569963	2.25306e-61
GLS	LINC01128	0.465448	8.10362e-39
LIAS	AC023509.4	0.420863	2.45216e-31
DLD	PAXIP1-AS2	0.418451	5.79857e-31
GLS	AC021016.2	0.426253	3.49265e-32
FDX1	RAB11B-AS1	0.42503	5.45129e-32
LIPT1	RAB11B-AS1	0.464656	1.12572e-38
LIAS	AP000350.5	0.427245	2.4308e-32
PDHA1	AP000350.5	0.404839	6.56043e-29
FDX1	AL392172.1	0.467202	3.89967e-39
LIPT1	AL392172.1	0.509929	1.81218e-47
GLS	AF106564.1	0.637929	5.1266e-81
GLS	HAR1A	0.537925	1.32312e-53
DLAT	AL162511.1	-0.434516	1.6431e-33
GLS	AC005330.1	0.42857	1.49491e-32
GLS	AC104836.1	0.427939	1.88445e-32
DLAT	AC126118.1	-0.413559	3.25336e-30
LIAS	SRP14-AS1	0.418207	6.32366e-31
MTF1	AC007786.2	0.448716	7.02995e-36
GLS	AC022400.1	0.66919	7.93594e-92
GLS	AC015726.1	0.517446	4.63781e-49
FDX1	AL596244.1	-0.46133	4.43578e-38
LIAS	LINC01184	0.429272	1.15453e-32
GLS	AL365181.4	0.402707	1.3493e-28
FDX1	AC004908.1	-0.418516	5.66661e-31
LIAS	UBR5-AS1	0.562779	1.47587e-59
FDX1	LINC01137	0.499465	2.56524e-45
DLAT	H1FX-AS1	-0.502399	6.50833e-46
GLS	PRKAG2-AS1	0.689331	1.60616e-99
GLS	AC010980.2	0.693434	3.63493e-101
FDX1	Z83843.1	-0.41803	6.73372e-31
LIAS	AL391834.1	0.42558	4.46366e-32
LIPT1	AC011451.1	0.441199	1.30251e-34
FDX1	CYTOR	0.462001	3.36809e-38
LIPT1	AC138207.2	0.415743	1.51177e-30
FDX1	AL133264.2	0.534374	8.55351e-53
FDX1	AC234775.3	-0.445991	2.04279e-35
GLS	AL662844.4	0.434902	1.42138e-33
LIAS	SCAMP1-AS1	0.413704	3.09186e-30
LIPT1	SCAMP1-AS1	0.464104	1.4146e-38
MTF1	SCAMP1-AS1	-0.476742	6.77879e-41
FDX1	AC008764.2	-0.434331	1.76055e-33
FDX1	AL450263.1	-0.516112	8.94652e-49
MTF1	LINC01094	0.407728	2.44853e-29
FDX1	AC110285.1	-0.449403	5.36405e-36
GLS	LINC00460	0.452834	1.37624e-36
MTF1	AL160006.1	0.496329	1.09506e-44
FDX1	AC016717.2	-0.435145	1.29715e-33
GLS	AC016717.2	0.416862	1.01852e-30
FDX1	AC009120.3	-0.456413	3.27736e-37
DLAT	LINC01089	-0.459834	8.17858e-38
GLS	AC005726.3	0.597584	8.61467e-69
FDX1	AC002456.1	0.539929	4.56969e-54
GLS	AP003355.2	0.89877	1.91431e-251
GLS	LINC02217	0.776577	8.74653e-142
LIPT1	PITPNA-AS1	0.533296	1.50038e-52
FDX1	AC093110.1	-0.40094	2.44268e-28
FDX1	AL354919.2	0.411614	6.40598e-30
LIAS	OSER1-DT	0.575442	8.65838e-63
LIPT1	OSER1-DT	0.432369	3.66435e-33
MTF1	AC090559.1	0.411802	6.00214e-30
FDX1	AC012146.1	0.448037	9.17606e-36
LIPT1	AC012146.1	0.549132	3.15674e-56
LIAS	AC016727.1	0.401415	2.08284e-28
LIPT1	AC016727.1	0.407279	2.85577e-29
FDX1	MIR9-3HG	-0.409063	1.54791e-29
FDX1	PVT1	0.432079	4.08346e-33
FDX1	AL035413.1	0.461948	3.44101e-38
LIPT1	KMT2E-AS1	0.408948	1.61073e-29
GLS	AL365361.1	0.734675	2.16981e-119
LIAS	TMEM254-AS1	0.400025	3.31759e-28
DLAT	AC110285.2	-0.429193	1.18838e-32
GLS	AC021683.1	0.708679	1.57254e-107
FDX1	MIR124-2HG	-0.464145	1.3912e-38
GLS	MIR124-2HG	0.472566	4.05824e-40
MTF1	ASH1L-AS1	-0.42934	1.12577e-32
DLAT	Z69706.1	-0.432443	3.56529e-33
FDX1	CARD8-AS1	0.540229	3.89512e-54
LIPT1	CARD8-AS1	0.465766	7.0988e-39
PDHA1	CARD8-AS1	-0.400874	2.49763e-28
FDX1	AC098487.1	0.411262	7.23819e-30
LIPT1	AC098487.1	0.412298	5.05034e-30
DLAT	AL021707.6	-0.409458	1.35078e-29
GLS	AC107398.3	0.455388	4.95092e-37
LIAS	MAPT-AS1	0.416798	1.04186e-30
FDX1	AC093458.1	-0.413372	3.47295e-30
LIAS	AC137723.1	0.447164	1.29217e-35
FDX1	AL391121.1	-0.42675	2.91334e-32
LIPT1	LINC02001	0.45077	3.12509e-36
FDX1	AL158212.3	-0.507383	6.14343e-47
LIPT1	AL158212.3	-0.414051	2.73828e-30
GLS	AL158212.3	0.455682	4.39885e-37
FDX1	AL139246.4	-0.415384	1.71507e-30
FDX1	AC015908.3	0.452199	1.77282e-36
LIAS	AC091271.1	0.443989	4.44556e-35
FDX1	ACAP2-IT1	-0.410982	7.97862e-30
GLS	ACAP2-IT1	0.69737	9.03901e-103
DLAT	AC092171.4	-0.428018	1.8308e-32
FDX1	AC009041.2	-0.405824	4.69321e-29
MTF1	AL109741.1	0.504266	2.70156e-46
LIAS	ALOX12-AS1	0.435372	1.19128e-33
FDX1	AC004067.1	0.460599	5.98402e-38
FDX1	LINC01521	-0.516349	7.96318e-49
LIPT1	LINC01521	-0.418185	6.37368e-31
